# Supplementary material for: Pregnancy-Induced High Plasma Levels of Soluble Endoglin in Mice Lead to Preeclampsia Symptoms and Placental Abnormalities
Source: MDPI journal article supplement (doi:10.3390/ijms22010165), 2020-12-26
Supplement: s1 [file s1]

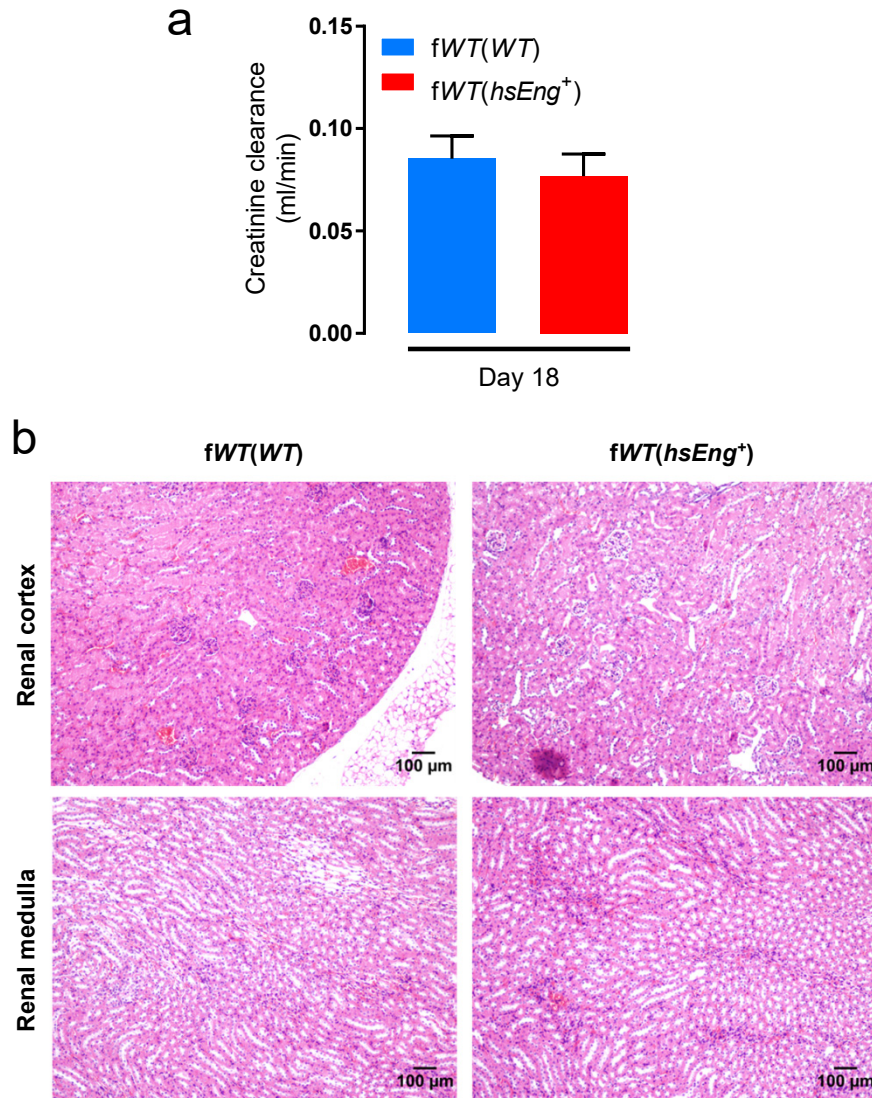

**Figure S1. Renal function in pregnant fWT(*hsEng*<sup>+</sup>) mice.** (a) Creatinine clearance of fWT(WT) and fWT(*hsEng*<sup>+</sup>) at day 18 of gestation [fWT(WT) n=7 and fWT(*hsEng*<sup>+</sup>) n=10]. (b) Hematoxylin-eosin staining of kidneys from fWT(WT) and fWT(*hsEng*<sup>+</sup>) mice at day 18. No significant alterations are observed in the histological study in either the renal cortex or the renal medulla. Mean  $\pm$  SEM are displayed.

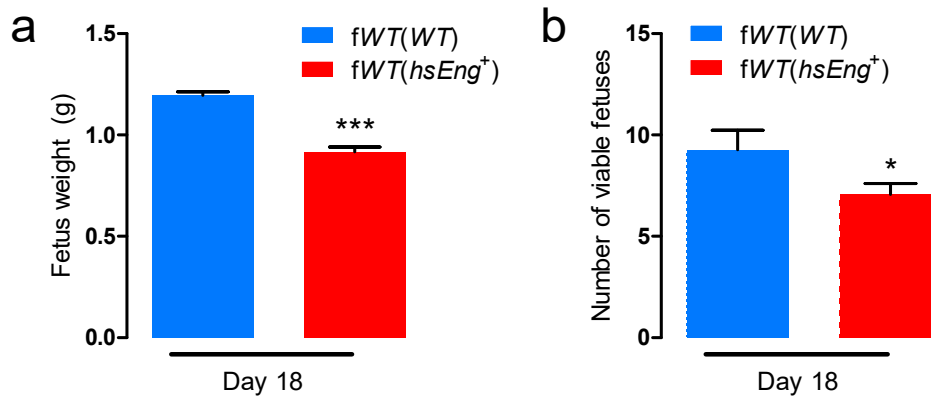

**Figure S2. Pregnant fWT(*hsEng*<sup>+</sup>) mice present reduced fetal weight and number of viable fetuses.** (a) Fetus weight of fWT(WT) and fWT(*hsEng*<sup>+</sup>) at day 18 of gestation [fWT(WT) n=103 and fWT(*hsEng*<sup>+</sup>) n=99]. (b) Number of viable fetuses per litter from fWT(WT) and fWT(*hsEng*<sup>+</sup>) [fWT(WT) n=11 and fWT(*hsEng*<sup>+</sup>) n=14]. Mean ± SEM are displayed. \*p<0.05; \*\*\*p<0.001 of fWT(*hsEng*<sup>+</sup>) vs fWT(WT).
